# Supplementary material
Source: MDPI journal article supplement (https://www.mdpi.com/2075-4701/5/3/1454)
Supplement: s1 [file s1]

Supplementary Information

**Figure S1.** UV-visible spectra of 3 month and 12 month old gold chloride solutions. The small differences in absorbance are attributed to the slight difference in pH and concentration of the measured samples (the spectrum of the HCl background is included for comparison).


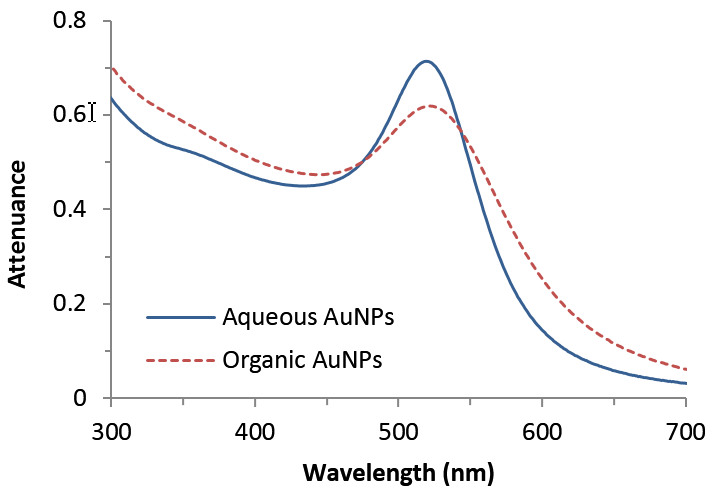


**Figure S2.** UV-visible spectra of citrate@AuNPs and oleylamine@AuNPs.


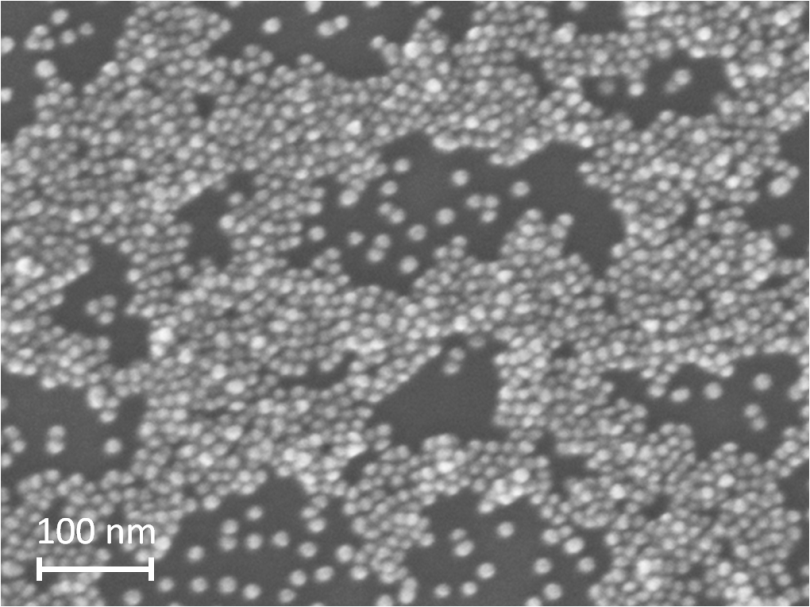


**Figure S3.** SEM image of citrate-stabilised gold nanoparticles (citrate@AuNPs).


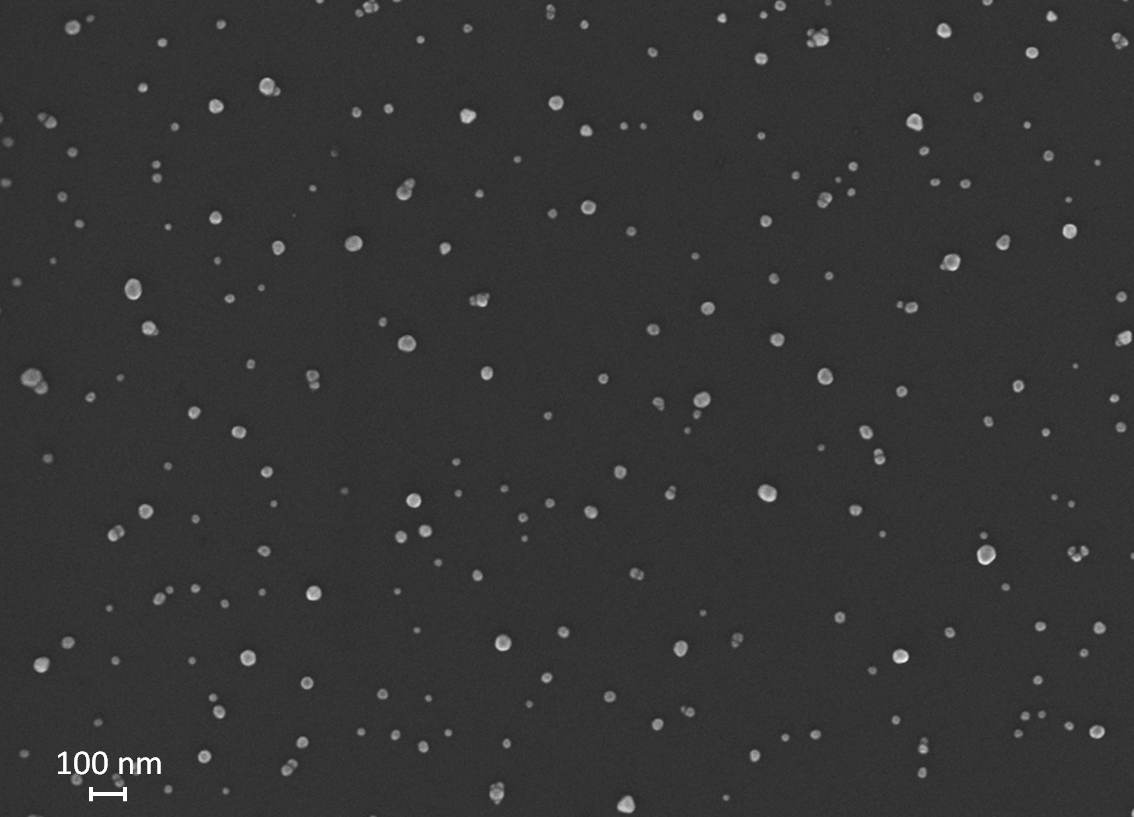


**Figure S4.** SEM image of oleylamine-stabilised gold nanoparticles (OA@AuNPs).

**Table S1**. ICP-MS data for diluted aqueous HAuCl4.

| **HAuCl4** | **[Au] (ppb)** | **[Mn] (ppb)** |
| --- | --- | --- |
| Sample 1 (4.0 × 10−6 mol L−1) | 929.6 | 0.000 |
| Sample 2 (3.7 × 10−6 mol L−1) | 686.8 | 0.000 |
